# Supplementary material for: A new redescription of Richtersius coronifer, supported by transcriptome, provides resources for describing concealed species diversity within the monotypic genus Richtersius (Eutardigrada)
Source: Zoological Lett. 2020 Feb 5;6:2. doi: 10.1186/s40851-020-0154-y (PMC7003491; doi:10.1186/s40851-020-0154-y)
Supplement: Supplementary file 1 — Additional file 1. Raw measurements of additional morphological traits and computed statistics. [file 40851_2020_154_MOESM1_ESM.xlsx]

## Sheet: Ric.cor_NO.385
Specimen	1	2	3	4	5	6	7	8	9	10
Pores density/2500um2 (PD)	88	76	72	75	79	69	67	60	72	81
Number of teeth on the external lunule III (ExtT)	11	11	11	10	11	11	10	9	11	10
Number of teeth on the internal lunule III (IntT)	9	10	12	9	10	10	8	9	11	10
Number of teeth on the posterior lunule IV (PosT)	11	10	11	11	11	10	10	11	11	11
Number of teeth on the anterior lunule IV (AntT)	9	13	10	9	10	9	9	9	9	13
Stylet support insertion point (SSIP)	73.899	75.6267	74.7445	74.6208	74.0314	72.203	72.3131	72.2892	73.7363	72.2595
External base/primary branch III (CCT)	55.7325	45.749	42.5	44.9631	45.4308	53.7931	50.3546	50.53	54.7619	52.3077
Pores sizes (PS)	1.1	1.2	1.2	1.1	1.3	1.1	1.3	1	0.7	1.5
	1.4	1.5	1.3	1.2	1.1	1.4	1.5	1.3	1.2	1.3
	1.3	1.6	1.3	1.1	1.1	1.3	1.5	0.9	1.1	1.5
	1.2	1.3	1.1	1.6	1.2	1.3	1.3	1.2	1	1
	1.3	0.9	1.2	1.5	0.8	1.4	1.2	1.1	0.9	1.2
	1.1	1.2	1.3	1.2	1.5	0.7	1.3	1.2	1.4	0.9
	1.3	1.1	1.1	1.6	1.5	1.5	1.1	1.2	1.5	0.7
	1.5	1.2	1.3	1	1.6	1.3	1.5	0.8	1.3	1.3
	1.2	1.2	0.9	1.3	1.3	1.2	1	1.5	1.4	1.1
	1.3	1.2	0.9	1.3	1	1	1.1	1.4	1.4	1.1

## Sheet: Ric.aff.cor_IT.120
Specimen	1	2	3	4	5	6	7	8	9	10
Pores density/2500um2 (PD)	10	11	12	6	9	10	12	13	9	7
Number of teeth on the external lunule III (ExtT)	13	14	15	16	14	17	12	12	14	14
Number of teeth on the internal lunule III (IntT)	15	13	12	13	14	13	14	11	12	12
Number of teeth on the posterior lunule IV (PosT)	15	17	14	15	15	19	17	16	15	17
Number of teeth on the anterior lunule IV (AntT)	17	21	16	14	18	22	17	14	18	21
Stylet support insertion point (SSIP)	68.0597	67.7285	70.059	66.7526	67.6096	70.1995	69.6581	70.7736	68.5544	67.3051
External base/primary branch III (CCT)	68.3721	59.4059	57.7465	58.1673	59.633	65	63.0841	59.5238	66.1972	61.3527
Pores sizes (PS)	2.2	1.9	2.6	2.1	2.3	1.8	2.6	2.3	2.2	2.1
	2.1	1.5	2	2	2.3	1.9	2.5	1.8	2.2	2.2
	2.2	1.3	2.3	2.5	2.4	2.2	2.2	1.6	2.3	2.3
	1.4	1.5	2.2	2.3	2	2.1	2.4	2.4	2.4	1.6
	1.8	1.6	2.2	2.2	1.9	2.3	1.6	2.3	2.1	2.1
	2.1	2.1	2.2	1.9	1.8	1.8	2.2	2.2	1.9	1.8
	2.2	1.5	2.1	2.3	3	2.5	2.2	2.3	2.3	2.4
	2	1.8	2.6	2.2	2.6	2.2	1.9	2.2	1.6	2.5
	1.5	1.7	2.3	1.5	2.7	2.4	1.9	2.1	2.2	1.9
	2.1	1.4	2.2	3	1.8	2.3	2.4	2.5	2.4	1.9

## Sheet: Ric.aff.cor_GR.008
Specimen	1	2	3	4	5	6	7	8	9	10
Pores density/2500um2 (PD)	4	5	6	4	10	6	6	4	7	5
Number of teeth on the external lunule III (ExtT)	12	11	12	13	12	14	13	13	12	13
Number of teeth on the internal lunule III (IntT)	10	11	12	12	11	13	12	15	11	11
Number of teeth on the posterior lunule IV (PosT)	12	13	11	14	11	15	14	12	12	15
Number of teeth on the anterior lunule IV (AntT)	10	11	9	14	14	15	12	10	12	14
Stylet support insertion point (SSIP)	63.6585	65.2796	66.3551	66.2307	63.6364	63.37	66.0494	65.8566	63.3375	63.3873
External base/primary branch III (CCT)	55.5556	46.7532	53.876	57.6577	59.2308	54.2857	55.6911	54.8638	59.0734	65.812
Pores sizes (PS)	2.2	2.8	3.4	2.9	2.8	3.3	2.7	4.2	3	3.7
	2.5	3.2	3.2	3.4	2.1	2.6	3.9	2.9	3.5	2.5
	1.9	3.3	2.9	3.2	2.3	3	3	2.5	3	3.8
	1.8	3	2.6	3.3	4.1	3.5	1.8	2.5	3	3.5
	1.6	2	2.5	3.5	3	3.5	2.1	2.9	1.8	2.1
	1.8	2.5	3	2.8	3	2.5	1.8	3.2	4.1	2.5
	2	2.7	2.5	3.5	2.8	2.1	2.2	2.1	1.6	2.9
	2.8	2.3	3.5	3.2	2.5	1.8	2.5	3	3.5	1.8
	2.7	2.5	3	2.8	3	1.9	4	1.8	3.7	1.8
	2.4	2.7	3	3.5	2.6	2.7	2.8	2.1	3.4	3.3

## Sheet: PD
Pores density/2500um2 (PD)
										Cell No.	Tukey HSD test; variable PD Approximate Probabilities for Post Hoc Tests Error: Between MS = 23,256, df = 27,000
											Population	{1}	{2}	{3}
										1	NO.385		0.000126937	0.000126937
										2	IT.120	0.000126937		0.145097
										3	GR.008	0.000126937	0.145097

## Sheet: PS
Pore size (PS)
												Cell No.	Tukey HSD test; variable Measurement (Pore_size) Approximate Probabilities for Post Hoc Tests Error: Between MS = ,16524, df = 270,00
													Population	{1}	{2}	{3}
												1	NO.385		2.17409e-05	2.17409e-05
												2	IT.120	2.17409e-05		2.17409e-05
												3	GR.008	2.17409e-05	2.17409e-05
											Effect	ANOVA for Measurement (Pore_size)
												SS	df	MS	F	p
											Intercept	1239.28	1	1239.28	7499.65	0
											Population	124.375	2	62.1875	376.336	0
											Specimen(Population)	10.8124	27	0.400459	2.42343	0.000181562
											Error	44.616	270	0.165245

## Sheet: IntT
Number of teeth on the internal lunule III (IntT)
								Cell No.	Tukey HSD test; variable IntT Approximate Probabilities for Post Hoc Tests Error: Between MS = 1,5593, df = 27,000
									Population	{1}	{2}	{3}
								1	NO.385		0.000141995	0.00376524
								2	IT.120	0.000141995		0.139257
								3	GR.008	0.00376524	0.139257

## Sheet: ExtT
Number of teeth on the external lunule III (ExtT)
								Cell No.	Tukey HSD test; variable ExtT Approximate Probabilities for Post Hoc Tests Error: Between MS = 1,2556, df = 27,000
									Population	{1}	{2}	{3}
								1	NO.385		0.000127015	0.00137912
								2	IT.120	0.000127015		0.0097507
								3	GR.008	0.00137912	0.0097507

## Sheet: AntT
Number of teeth on the anterior lunule IV (AntT)
								Cell No.	Tukey HSD test; variable AntT Approximate Probabilities for Post Hoc Tests Error: Between MS = 4,9815, df = 27,000
									Popolation	{1}	{2}	{3}
								1	NO.385		0.000126945	0.107976
								2	IT.120	0.000126945		0.000136243
								3	GR.008	0.107976	0.000136243

## Sheet: PosT
Number of teeth on the posterior lunule IV (PosT)
								Cell No.	Tukey HSD test; variable PostT Approximate Probabilities for Post Hoc Tests Error: Between MS = 1,5926, df = 27,000
									Population	{1}	{2}	{3}
								1	NO.385		0.000126937	0.00172487
								2	IT.120	0.000126937		0.000144871
								3	GR.008	0.00172487	0.000144871

## Sheet: SSIP
Stylet support insertion point (SSIP)
								Cell No.	Tukey HSD test; variable SSIP Approximate Probabilities for Post Hoc Tests Error: Between MS = 1,5926, df = 27,000
									Population	{1}	{2}	{3}
								1	NO.385		0.000126938	0.000126937
								2	IT.120	0.000126938		0.0001274
								3	GR.008	0.000126937	0.0001274

[truncated: 1 more sheets: CCT]
