# Supplementary material for: A new redescription of Richtersius coronifer, supported by transcriptome, provides resources for describing concealed species diversity within the monotypic genus Richtersius (Eutardigrada)
Source: Zoological Lett. 2020 Feb 5;6:2. doi: 10.1186/s40851-020-0154-y (PMC7003491; doi:10.1186/s40851-020-0154-y)
Supplement: Supplementary file 2 — Additional file 2. Raw morphometric measurements underlying the proposed redescription of R. coronifer s.s. [file 40851_2020_154_MOESM2_ESM.xlsx]

## Sheet: instructions
	INSTRUCTIONS and TERMS OF USE
	1	This is a morphometric template for species of the Tardigrada Order Parachela.
	2	The template caluclates the pt ratio and other relative measures only if all measurements required to calculate a ratio are provided (otherwise the ratio cell remains empty, meaning lack of data). The only numbers you need to enter are absolute measurements in micrometres [μm] in the sheet "individuals". If a structure is not measurable leave the cell empty (enetring zeros will mean that the trai…
	3	The "individuals" sheet automatically calculates basic statistics (number of measurements, range, mean and SD). The table with these statistics is placed after the last (30th) specimen. The summary table can be then copied and pasted directly to MS Word.
	4	If measurements are done on the type series, please enter the holotype in the first column (this way holotype data are automatically copied to the summary table at end of the sheet). If measurements are not done on the type series, you may delete the last two columns in the summary table. You may change specimen/slide names as desired.
	5	If a trait listed is not present in the species you are measuring, remove the entire row (highlight the row, right mouse click, choose "delete").
	6	Data from the sheet "individuals" are automatically copied to the four remaining "stats" sheets. Data in those sheets are arranged for statistical analyses in the majority of statistical software.
	7	If you want to see the formulas behind this template, press Ctrl+` (usually just before "1" on the keyboard). To return to the value view, press Ctrl+` again.
	8	This template can be freely used but each published use must be credited as Morphometric data were handled using the Parachela ver. 1.7 template available from the Tardigrada Register, www.tardigrada.net/register (Michalczyk & Kaczmarek 2013). The reference is: Michalczyk, Ł. & Kaczmarek, Ł. (2013) The Tardigrada Register: a comprehensive online data repository for tardigrade taxonomy. Journal of…
	9	Copyright by Łukasz Michalczyk. Enquires and suggestions: LM@tardigrada.net

## Sheet: general info
	Species		Richtersius coronifer
	Population		NO.385
	Type series		YES
	Author		Łukasz Krzywański
	Date		30.08.2018

## Sheet: animals
SPECIMEN	1 (HOL)		2		3		4		5		6		7		8		9		10		11		12		13		14		15		16		17		18		19		20		21		22		23		24		25
CHARACTER	µm	pt	µm	pt	µm	pt	µm	pt	µm	pt	µm	pt	µm	pt	µm	pt	µm	pt	µm	pt	µm	pt	µm	pt	µm	pt	µm	pt	µm	pt	µm	pt	µm	pt	µm	pt	µm	pt	µm	pt	µm	pt	µm	pt	µm	pt	µm	pt	µm
Body length	984	1056.93	542	754.875	553	807.299	1027	1038.42	977	1023.04	875	1009.23	901	1052.57	934	1125.3	929	1020.88	953	1066	929	1018.64	918	950.311	841	937.57	826	871.308	717	861.779	651	751.732	499	700.843	572	820.66	532	752.475	571	801.966	602	826.923	889	884.577	902	995.585	807	870.55	807
Buccopharyngeal tube
Buccal tube length	93.1	–	71.8	–	68.5	–	98.9	–	95.5	–	86.7	–	85.6	–	83	–	91	–	89.4	–	91.2	–	96.6	–	89.7	–	94.8	–	83.2	–	86.6	–	71.2	–	69.7	–	70.7	–	71.2	–	72.8	–	100.5	–	90.6	–	92.7	–	98.6
Stylet support insertion point	68.8	73.899	54.3	75.6267	51.2	74.7445	73.8	74.6208	70.7	74.0314	62.6	72.203	61.9	72.3131	60	72.2892	67.1	73.7363	64.6	72.2595	65.8	72.1491	71.9	74.4306	66.7	74.359	70	73.8397	60.5	72.7163	63.8	73.6721	53.8	75.5618	52.3	75.0359	53.4	75.5304	53.4	75	53.2	73.0769	74.4	74.0299	67.4	74.3929	69.3	74.7573	72.9
Buccal tube external width	9.5	10.2041	6.4	8.91365	6.8	9.92701	10.1	10.2123	10.5	10.9948	9	10.3806	7.8	9.11215	8.3	10	8.3	9.12088	9.3	10.4027	7.7	8.44298	8	8.28157	8	8.91862	10	10.5485	7.4	8.89423	7.7	8.89145	6.7	9.41011	7.2	10.33	5.6	7.92079	7.5	10.5337	5.9	8.1044	7.6	7.56219	9.3	10.2649	8.6	9.27724	7.8
Buccal tube internal width	1.9	2.04082	1.6	2.22841	1.7	2.48175	1.9	1.92113	2.3	2.40838	2.1	2.42215	2.1	2.45327	2.9	3.49398	3.5	3.84615	1.6	1.78971	1.8	1.97368	2.2	2.27743	1.5	1.67224	1.9	2.00422	2	2.40385	1.9	2.194	1.4	1.96629	1.6	2.29555	1.7	2.40453	1.7	2.38764	1.8	2.47253	2.1	2.08955	1.8	1.98675	2.3	2.48112	1.7
Ventral lamina length	43.3	46.5091	32.1	44.7075	33.4	48.7591	43.2	43.6805	45.3	47.4346	37.3	43.0219	34.3	40.0701	35.2	42.4096	43.1	47.3626	43.1	48.2103	39.5	43.3114	45.1	46.6874	41.5	46.2653	39.1	41.2447	39.9	47.9567	41.6	48.037	32.3	45.3652	32	45.911	34.9	49.3635	36	50.5618	36	49.4505	41.6	41.393	45.9	50.6623	47.6	51.3484	47.5
Placoid lengths
Macroplacoid 1	11.4	12.2449	11.1	15.4596	10	14.5985	15.5	15.6724	13.2	13.822	13.8	15.917	13.3	15.5374	13.1	15.7831	13.6	14.9451	13.2	14.7651	14.4	15.7895	15.4	15.942	13.2	14.7157	14.4	15.1899	9.1	10.9375	11.8	13.6259	7.5	10.5337	9	12.9125	8	11.3154	8.8	12.3596	8	10.989	14.6	14.5274	14.4	15.894	13.8	14.8867	13.4
Macroplacoid 2	10.1	10.8485	8.1	11.2813	6.2	9.05109	11.5	11.6279	10.9	11.4136	10.9	12.5721	9.1	10.6308	9.7	11.6867	8.3	9.12088	10.8	12.0805	10.1	11.0746	9.6	9.93789	8.7	9.699	10.3	10.865	7.2	8.65385	8.2	9.46882	7	9.83146	7.2	10.33	7.1	10.0424	7.9	11.0955	7.9	10.8516	9.8	9.75124	9.5	10.4857	9.2	9.92449	9.3
Macroplacoid row	22.9	24.5972	20	27.8552	17.9	26.1314	26.2	26.4914	25.8	27.0157	25.3	29.1811	23.5	27.4533	24.7	29.759	28.5	31.3187	25.2	28.1879	26.3	28.8377	26.5	27.4327	23	25.641	26	27.4262	18.4	22.1154	20.8	24.0185	14.8	20.7865	17.6	25.2511	16.5	23.338	17.6	24.7191	16.6	22.8022	25.3	25.1741	23.4	25.8278	23.3	25.1348	22.9
Claw 1 heights
External base	16.8	18.0451	11	15.3203	10.7	15.6204	16.7	16.8857	17	17.801	15.4	17.7624	17.6	20.5607	15	18.0723	12.3	13.5165	15.8	17.6734			16.9	17.4948	14.9	16.6109	15.4	16.2447	13.6	16.3462					12.6	18.0775	9.2	13.0127	9.4	13.2022	11.3	15.522					15.9	17.1521	15
External primary branch	28.73	30.8593	23.7	33.0084	24.2	35.3285	28.7	29.0192	31.1	32.5654	26.1	30.1038	31.4	36.6822	25.9	31.2048	25.6	28.1319	28.5	31.8792			29	30.0207	29.1	32.4415	26	27.4262	25.4	30.5288					23	32.9986	21.6	30.5516	22.4	31.4607	20.9	28.7088					27.2	29.342	28
External secondary branch	22.1	23.7379	14.4	20.0557	14.2	20.7299	20.3	20.5258	21.4	22.4084	20.2	23.2987	21.5	25.1168			17	18.6813	20	22.3714			19.1	19.7723	19.7	21.9621	18.8	19.8312	14.1	16.9471					12.1	17.3601	12.4	17.5389	13.2	18.5393	14.3	19.6429					20.1	21.6828	19.7
External base/primary branch (cct)	58.4755	–	46.4135	–	44.2149	–	58.1882	–	54.6624	–	59.0038	–	56.051	–	57.9151	–	48.0469	–	55.4386	–		–	58.2759	–	51.2027	–	59.2308	–	53.5433	–		–		–	54.7826	–	42.5926	–	41.9643	–	54.067	–		–		–	58.4559	–	53.5714
Internal base	12.8	13.7487	11.8	16.4345	11.7	17.0803	16.6	16.7846	16.1	16.8586			16.5	19.2757	15.1	18.1928	15.4	16.9231	14.6	16.3311			15.6	16.1491	13.7	15.2731	14.9	15.7173	14	16.8269			10.7	15.0281	10.7	15.3515	8.6	12.1641	9.7	13.6236	9.1	12.5			15.2	16.777	14.2	15.3182
Internal primary branch	26.1	28.0344	23.9	33.2869	25	36.4964	28.7	29.0192	30.8	32.2513	27	31.1419	29.8	34.8131	28	33.7349	27.2	29.8901	27.9	31.2081			29.6	30.6418	26.4	29.4314	28.7	30.2743	27.4	32.9327			23.6	33.1461	24.8	35.5811	21.4	30.2687			20.8	28.5714	25.3	25.1741	29.9	33.0022	27.8	29.9892
Internal secondary branch			12.9	17.9666	14	20.438	19.7	19.9191	19.1	20			20.3	23.715	21.5	25.9036	18.2	20	18.1	20.2461			16.7	17.2878	15.6	17.3913	18.3	19.3038	17.4	20.9135			14.4	20.2247	12.5	17.934	10.9	15.4173	12.2	17.1348	10.7	14.6978	14.8	14.7264	19.7	21.7439	18.3	19.7411
Internal base/primary branch (cct)	49.0421	–	49.3724	–	46.8	–	57.8397	–	52.2727	–		–	55.3691	–	53.9286	–	56.6176	–	52.3297	–		–	52.7027	–	51.8939	–	51.9164	–	51.0949	–		–	45.339	–	43.1452	–	40.1869	–		–	43.75	–		–	50.8361	–	51.0791	–
Claw 2 heights
External base	15.4	16.5414			11.9	17.3723	19	19.2113			15.6	17.9931	17.9	20.9112			14.7	16.1538	16.4	18.3445	15.4	16.886	17.1	17.7019	16.7	18.6176	15.9	16.7722	13.7	16.4663	16.2	18.7067	10.2	14.3258	10.1	14.4907	9.6	13.5785	10.6	14.8876			14.3	14.2289			17.4	18.7702	17.3
External primary branch	30.5	32.7605	24.7	34.4011	26.5	38.6861	33.6	33.9737	31.6	33.089	27.9	32.1799	32.1	37.5	30.3	36.506	29	31.8681	31.3	35.0112	27.7	30.3728	33.7	34.8861	29.9	33.3333	27.8	29.3249	29.1	34.976	29.8	34.4111	24	33.7079	24.7	35.4376	23.6	33.3805	24.3	34.1292			28	27.8607	30.9	34.106	31.2	33.657	29.7
External secondary branch	22.9	24.5972	15.1	21.0306	14.3	20.8759	17.5	17.6946	22.6	23.6649	20.4	23.5294	21.4	25			17.7	19.4505	19.7	22.0358	19.1	20.943	20.9	21.6356	18.4	20.5128	19.7	20.7806	16.2	19.4712	19.5	22.5173	13.4	18.8202	14.2	20.373			14.8	20.7865			19.2	19.1045	18.7	20.6402	22.9	24.7033	21.4
External base/primary branch (cct)	50.4918	–		–	44.9057	–	56.5476	–		–	55.914	–	55.7632	–		–	50.6897	–	52.3962	–	55.5957	–	50.7418	–	55.8528	–	57.1942	–	47.079	–	54.3624	–	42.5	–	40.8907	–	40.678	–	43.6214	–		–	51.0714	–		–	55.7692	–	58.2492
Internal base	15.6	16.7562			10.4	15.1825	17.1	17.2902	16.2	16.9634	16.5	19.0311	18.2	21.2617			15.2	16.7033	14.9	16.6667	14.8	16.2281	15.4	15.942	14.7	16.388	16.5	17.4051	14.1	16.9471	15	17.321	10.6	14.8876	10.4	14.9211	9	12.7298	12.6	17.6966					18.2	20.0883	15.2	16.397	16.4
Internal primary branch	30.1	32.3308	25.7	35.7939	24.9	36.3504	31.3	31.6481	33.1	34.6597	29	33.4487	31.6	36.9159			30.1	33.0769	33.3	37.2483	27	29.6053	35.2	36.4389	28.7	31.9955	30.8	32.4895	30.2	36.2981	32	36.9515	24.6	34.5506	24.4	35.0072	23.7	33.5219	24.3	34.1292			27.7	27.5622	31.6	34.8786	29.6	31.931	30
Internal secondary branch	19.7	21.16	12.8	17.8273	13.2	19.2701	19.4	19.6158	18.6	19.4764	19.6	22.6067	21.8	25.4673			17.9	19.6703	16.8	18.7919	17.9	19.6272	20.7	21.4286	17.4	19.398	18.8	19.8312	17.1	20.5529	17.2	19.8614	13.4	18.8202	13	18.6514	13.2	18.6704	15.5	21.7697			16.6	16.5174	20.6	22.7373	18.4	19.849	21.6
Internal base/primary branch (cct)	51.8272	–		–	41.7671	–	54.6326	–	48.9426	–	56.8966	–	57.5949	–		–	50.4983	–	44.7447	–	54.8148	–	43.75	–	51.2195	–	53.5714	–	46.6887	–	46.875	–	43.0894	–	42.623	–	37.9747	–	51.8519	–		–		–	57.5949	–	51.3514	–	54.6667
Claw 3 heights
External base	17.5	18.797	11.3	15.7382	10.2	14.8905	18.3	18.5035	17.4	18.2199	15.6	17.9931			14.2	17.1084	14.3	15.7143	18.4	20.5817	15.9	17.4342	17	17.5983	15.5	17.2798			15.4	18.5096	17.2	19.8614	10.4	14.6067	9.7	13.9168			11.4	16.0112					16.4	18.1015
External primary branch	31.4	33.7272	24.7	34.4011	24	35.0365	40.7	41.1527	38.3	40.1047	29	33.4487	34.7	40.5374	28.2	33.9759	28.3	31.0989	33.6	37.5839	27.6	30.2632	32.5	33.6439	27.2	30.3233			29.1	34.976	30	34.642	24.2	33.9888	24.7	35.4376			24.7	34.691	24.7	33.9286			31.8	35.0993	30.9	33.3333
External secondary branch	22.1	23.7379	14.6	20.3343	12	17.5182	22.6	22.8514	23.1	24.1885	20.3	23.4141			20.5	24.6988	17.7	19.4505	22.2	24.8322	20.5	22.4781	20	20.7039	20.7	23.0769			17.3	20.7933	19.9	22.9792	13.5	18.9607	12.2	17.5036			13.5	18.9607					22.9	25.2759	21.3	22.9773
External base/primary branch (cct)	55.7325	–	45.749	–	42.5	–	44.9631	–	45.4308	–	53.7931	–		–	50.3546	–	50.53	–	54.7619	–	57.6087	–	52.3077	–	56.9853	–		–	52.921	–	57.3333	–	42.9752	–	39.2713	–		–	46.1538	–		–		–	51.5723	–		–
Internal base	15.8	16.971	11.2	15.5989	11.1	16.2044	20.6	20.8291	16.7	17.4869					17.7	21.3253	12.8	14.0659	15.4	17.226	16.1	17.6535			16.2	18.0602			13.9	16.7067	13.7	15.8199	10.1	14.1854	9.8	14.0603			11.3	15.8708	10.5	14.4231			14.9	16.4459	16.8	18.123
Internal primary branch	31.2	33.5124	25.5	35.5153	25.5	37.2263	42.4	42.8716	31.1	32.5654					31.1	37.4699	27.9	30.6593	32	35.7942	28.1	30.8114			33	36.7893			28	33.6538	30.2	34.873	25.1	35.2528	24.1	34.5768			24.1	33.8483	22.6	31.044			30.9	34.106	33.2	35.8145
Internal secondary branch	19.6	21.0526	13.5	18.8022	12.4	18.1022	23.9	24.1658	18.9	19.7906					18.8	22.6506	15.7	17.2527	17.6	19.6868	18	19.7368			18.9	21.0702			15.1	18.149	13.6	15.7044	14.5	20.3652	12.3	17.6471			13.5	18.9607	13.7	18.8187			18.6	20.5298	19.6	21.1435
Internal base/primary branch (cct)	50.641	–	43.9216	–	43.5294	–	48.5849	–	53.6977	–		–		–	56.9132	–	45.8781	–	48.125	–	57.2954	–		–	49.0909	–		–	49.6429	–	45.3642	–	40.239	–	40.6639	–		–	46.888	–	46.4602	–		–	48.2201	–	50.6024	–
Claw 4 heights
Anterior base	18.9	20.3008	15.6	21.727	15	21.8978	14.9	15.0657	19.8	20.733			22	25.7009			17.3	19.011	15.2	17.0022	19.8	21.7105	16.5	17.0807	16.4	18.2832	18.9	19.9367	16.9	20.3125	16.6	19.1686	14.1	19.8034	12.6	18.0775	13.2	18.6704	15.5	21.7697	15	20.6044			20.3	22.4062	21.4	23.0852	21.2
Anterior primary branch	39.8	42.7497	37.8	52.6462	33	48.1752	32.8	33.1648	38	39.7906	38.6	44.5213	44.4	51.8692			34.2	37.5824	32.7	36.5772	36.3	39.8026	38.3	39.648	36.6	40.8027	37.1	39.135	36.3	43.6298	39.2	45.2656	30.8	43.2584	29.1	41.7504	29.4	41.5842	34.1	47.8933	32.5	44.6429					42	45.3074	41.7
Anterior secondary branch	23.3	25.0269	17.4	24.234	17.9	26.1314	20	20.2224	22.7	23.7696			24.6	28.7383			19.9	21.8681	23.9	26.7338	24.7	27.0833	21.1	21.8427	18.9	21.0702	21.8	22.9958	17.9	21.5144	20.6	23.7875	15.3	21.4888	13.6	19.5122	25.4	35.9264	17.3	24.2978	16.5	22.6648			23	25.3863	28	30.205	25.3
Anterior base/primary branch (cct)	47.4874	–	41.2698	–	45.4545	–	45.4268	–	52.1053	–		–	49.5495	–		–	50.5848	–	46.4832	–	54.5455	–	43.0809	–	44.8087	–	50.9434	–	46.5565	–	42.3469	–	45.7792	–	43.299	–	44.898	–	45.4545	–	46.1538	–		–		–	50.9524	–	50.8393
Posterior base	22.1	23.7379	14.9	20.7521	14.4	21.0219	16.8	16.9869	17.3	18.1152	16.7	19.2618	18.6	21.729	16.9	20.3614	16.9	18.5714	18.9	21.1409	16.9	18.5307	23.5	24.3271	16.7	18.6176	18.6	19.6203	18.3	21.9952	19	21.94	13.9	19.5225	15.1	21.6643	11.4	16.1245	13.8	19.382	12.9	17.7198					20.9	22.5458	21.4
Posterior primary branch	40	42.9646	33.4	46.5181	33	48.1752	33.8	34.1759	39.5	41.3613	37.1	42.7912	42.2	49.2991	35.3	42.5301	34.9	38.3516	39.3	43.9597	36.2	39.693	41.4	42.8571	33.2	37.0123	36.7	38.7131	34.1	40.9856	35.9	41.455	30.5	42.8371	31.3	44.9067	27.3	38.6139	31.2	43.8202	31.4	43.1319			37.1	40.9492	39	42.0712	38
Posterior secondary branch	25.9	27.8195	16.8	23.3983	16.8	24.5255	19.1	19.3124	19.6	20.5236	20.9	24.1061	24.6	28.7383	21.5	25.9036	20.6	22.6374	23.2	25.9508	26.5	29.057	27.3	28.2609	17.1	19.0635	21.2	22.3629	21.9	26.3221	21.3	24.5958	16	22.4719	14.1	20.2296	12.8	18.1047	15.7	22.0506	15.3	21.0165			22.8	25.1656	24.1	25.9978	24
Posterior base/primary branch (cct)	55.25	–	44.6108	–	43.6364	–	49.7041	–	43.7975	–	45.0135	–	44.0758	–	47.8754	–	48.4241	–	48.0916	–	46.6851	–	56.7633	–	50.3012	–	50.6812	–	53.6657	–	52.9248	–	45.5738	–	48.2428	–	41.7582	–	44.2308	–	41.0828	–		–		–	53.5897	–	56.3158
Eyes (0 = absent; 1 = present)	1		1		1		1		1		1		1		1		1		1		1		1		1		1		1		1		1		1		1		1		1		1		1		1		1
Cuticular pores (0/1)	0		1		1		0		0		0		0		0		0		0		0		0		0		0		0		0		1		1		1		1		1		0		0		0		0
Lunules I with teeth (0/1)	1		1		1		1		1		1		1		1		1		1		1		1		1		1		1		1		1		1		1		1		1		1		1		1		1
Lunules II with teeth (0/1)	1		1		1		1		1		1		1		1		1		1		1		1		1		1		1		1		1		1		1		1		1		1		1		1		1
Lunules III with teeth (0/1)	1		1		1		1		1		1		1		1		1		1		1		1		1		1		1		1		1		1		1		1		1		1		1		1		1
Lunules IV with teeth (0/1)	1		1		1		1		1		1		1		1		1		1		1		1		1		1		1		1		1		1		1		1		1		1		1		1		1
Granulation on legs I (0/1)	0		0		0		0		0		0		0		0		0		0		0		0		0		0		0		0		0		0		0		0		0		0		0		0		0
Granulation on legs II (0/1)	0		0		0		0		0		0		0		0		0		0		0		0		0		0		0		0		0		0		0		0		0		0		0		0		0
Granulation on legs III (0/1)	0		0		0		0		0		0		0		0		0		0		0		0		0		0		0		0		0		0		0		0		0		0		0		0		0
Granulation on legs IV (0/1)	0		0		0		0		0		0		0		0		0		0		0		0		0		0		0		0		0		0		0		0		0		0		0		0		0
[truncated: 25 more columns]

## Sheet: eggs
CHARACTER	1	2	3	4	5	6	7	8	9	10	11	12	13	14	15	16	17	18	19	20	21	22	23	24	25	26	27	28	29	30		CHARACTER	N	RANGE			MEAN	SD
Egg bare diameter	223	205.9	215.5	206.5	208.3	182	233.4	221.7	197.7	176	176.1	180.6	185.9	208.4	204.6	182.6	186.6	222.7	194.5	227.5	199.4	203.5	173.2	198.7	188.8	196.9	213.5	207.5	197.5	199.5		Egg bare diameter	30	173.2	–	233.4	200.6	16.1148
Egg full diameter	259.7	240.5	249.1	234.4	249.6	218	263.7	252.3	227.7	206.3	209.2	214.2	215.5	245.5	246.9	220.8	211.7	246.5	227.1	246.5	227.8	218.5	201.5	237.2	223.9	225.8	244.4	240.2	239.6	247.3		Egg full diameter	30	201.5	–	263.7	233.047	16.584
Process height	22.3	22.4	23	21.1	21.8	17.2	26.3	21.5	19.4	17.2	21.6	23.7	19.9	26.9	28.3	25.4	13.6	25.4	23.1	21.8	25.2	22	16.2	22.9	23.5	21.1	22.5	27.3	24.3	23.5		Process height	90	13	–	28.3	21.6922	3.15699
	22.7	23.3	21.6	22.5	24.6	22.5	23.6	20.4	17.9	16.7	20.9	24	17.7	24.6	24.8	24.8	13.2	20.8	24.9	17.6	25.5	21.2	20	22.7	19.7	22.4	21.2	24.2	19.8	20.1		Process base width	90	2.7	–	6.9	4.62111	0.872745
	20.9	22.8	23.8	22.3	21	22.8	24.5	19.6	15.2	17.4	19.3	23.8	19.3	24.5	27	24.8	13	24.3	22.4	19.8	24.8	23	16.2	17.3	20.4	24.1	22	19.6	21.4	18.7		Process base/height ratio	90	0.118943	–	0.331395	0.2165	0.0459171
Process base width	4.6	5.7	5.9	4.4	4.4	3.8	4	4.8	6.4	5.7	4.4	4.2	4.5	5.3	6	4.7	3.9	5	5.7	4.3	4.2	3.8	5.2	4.2	3.8	3.5	4	5.5	3.5	4.1		Inter-process distance	90	4.4	–	13.2	8.35444	1.7552
	4.5	5	6.2	5	4.1	4	5.8	5.8	5	4.7	5.5	3.5	4.6	4.3	4.7	6.2	3.5	5.4	6.8	5.5	4.9	3.7	5.2	2.7	4.2	3.8	3.8	3.2	4.8	4.3		Number of processes on the egg circumference	30	60	–	77	67.0667	4.54049
	4.8	6.9	4.9	4.3	4.2	4.8	4	5.2	3.4	4.4	3.8	5.5	4.3	4.9	5.3	6.5	3.7	5.1	4.8	4.4	4.9	4.8	4	3.2	3.6	3.9	3.2	4.4	4.9	3.6
Process base/height ratio	0.206278	0.254464	0.256522	0.208531	0.201835	0.22093	0.152091	0.223256	0.329897	0.331395	0.203704	0.177215	0.226131	0.197026	0.212014	0.185039	0.286765	0.19685	0.246753	0.197248	0.166667	0.172727	0.320988	0.183406	0.161702	0.165877	0.177778	0.201465	0.144033	0.174468
	0.198238	0.214592	0.287037	0.222222	0.166667	0.177778	0.245763	0.284314	0.27933	0.281437	0.263158	0.145833	0.259887	0.174797	0.189516	0.25	0.265152	0.259615	0.273092	0.3125	0.192157	0.174528	0.26	0.118943	0.213198	0.169643	0.179245	0.132231	0.242424	0.21393
	0.229665	0.302632	0.205882	0.192825	0.2	0.210526	0.163265	0.265306	0.223684	0.252874	0.196891	0.231092	0.222798	0.2	0.196296	0.262097	0.284615	0.209877	0.214286	0.222222	0.197581	0.208696	0.246914	0.184971	0.176471	0.161826	0.145455	0.22449	0.228972	0.192513
Inter-process distance	10.9	4.8	8.7	6.7	8.6	6.9	7	8.2	8.4	7.6	5.9	9.2	8	8.3	10.3	8.4	9.6	10.6	8.4	6.3	7.5	10.8	7.8	11.7	7.8	9.5	11.1	7.6	7.9	6.5
	13.2	6.2	7.8	9.5	8.7	5.6	4.4	7.7	9	11.4	8.8	9.2	10.6	9.1	7.9	7.2	8.5	8.2	6.3	5.3	7.1	10.5	8	9.6	6.1	10.6	11.7	10.5	8.4	7.7
	9.1	7.6	7.2	6.7	6.9	6.6	6.9	6	9.2	9.8	9.8	9.3	9.1	8.8	10.3	6.2	8	9.7	6.4	7.5	6.3	9.4	7.2	10.5	6.4	11.6	10.6	6.3	9.1	7.6
Number of processes on the egg circumference	62	67	70	73	75	61	65	73	66	60	65	67	68	63	77	67	66	62	64	62	65	64	60	71	73	66	68	71	70	71

## Sheet: animals_stats (µm)
Species	Population	Individual	Body length	Buccal tube length	Stylet support insertion point	Buccal tube external width	Buccal tube internal width	Ventral lamina length	Macroplacoid 1	Macroplacoid 2	Macroplacoid row	Claw 1 external base	Claw 1 external primary branch	Claw 1 external secondary branch	Claw 1 external base/primary branch	Claw 1 internal base	Claw 1 internal primary branch	Claw 1 internal secondary branch	Claw 1 internal base/primary branch	Claw 2 external base	Claw 2 external primary branch	Claw 2 external secondary branch	Claw 2 external base/primary branch	Claw 2 internal base	Claw 2 internal primary branch	Claw 2 internal secondary branch	Claw 2 internal base/primary branch	Claw 3 external base	Claw 3 external primary branch	Claw 3 external secondary branch	Claw 3 external base/primary branch	Claw 3 internal base	Claw 3 internal primary branch	Claw 3 internal secondary branch	Claw 3 internal base/primary branch	Claw 4 anterior base	Claw 4 anterior primary branch	Claw 4 anterior secondary branch	Claw 4 anterior base/primary branch	Claw 4 posterior base	Claw 4 posterior primary branch	Claw 4 posterior secondary branch	Claw 4 posterior base/primary branch
Richtersius coronifer	NO.385	1 (HOL)	984	93.1	68.8	9.5	1.9	43.3	11.4	10.1	22.9	16.8	28.73	22.1	58.4755	12.8	26.1		49.0421	15.4	30.5	22.9	50.4918	15.6	30.1	19.7	51.8272	17.5	31.4	22.1	55.7325	15.8	31.2	19.6	50.641	18.9	39.8	23.3	47.4874	22.1	40	25.9	55.25
Richtersius coronifer	NO.385	2	542	71.8	54.3	6.4	1.6	32.1	11.1	8.1	20	11	23.7	14.4	46.4135	11.8	23.9	12.9	49.3724		24.7	15.1			25.7	12.8		11.3	24.7	14.6	45.749	11.2	25.5	13.5	43.9216	15.6	37.8	17.4	41.2698	14.9	33.4	16.8	44.6108
Richtersius coronifer	NO.385	3	553	68.5	51.2	6.8	1.7	33.4	10	6.2	17.9	10.7	24.2	14.2	44.2149	11.7	25	14	46.8	11.9	26.5	14.3	44.9057	10.4	24.9	13.2	41.7671	10.2	24	12	42.5	11.1	25.5	12.4	43.5294	15	33	17.9	45.4545	14.4	33	16.8	43.6364
Richtersius coronifer	NO.385	4	1027	98.9	73.8	10.1	1.9	43.2	15.5	11.5	26.2	16.7	28.7	20.3	58.1882	16.6	28.7	19.7	57.8397	19	33.6	17.5	56.5476	17.1	31.3	19.4	54.6326	18.3	40.7	22.6	44.9631	20.6	42.4	23.9	48.5849	14.9	32.8	20	45.4268	16.8	33.8	19.1	49.7041
Richtersius coronifer	NO.385	5	977	95.5	70.7	10.5	2.3	45.3	13.2	10.9	25.8	17	31.1	21.4	54.6624	16.1	30.8	19.1	52.2727		31.6	22.6		16.2	33.1	18.6	48.9426	17.4	38.3	23.1	45.4308	16.7	31.1	18.9	53.6977	19.8	38	22.7	52.1053	17.3	39.5	19.6	43.7975
Richtersius coronifer	NO.385	6	875	86.7	62.6	9	2.1	37.3	13.8	10.9	25.3	15.4	26.1	20.2	59.0038		27			15.6	27.9	20.4	55.914	16.5	29	19.6	56.8966	15.6	29	20.3	53.7931						38.6			16.7	37.1	20.9	45.0135
Richtersius coronifer	NO.385	7	901	85.6	61.9	7.8	2.1	34.3	13.3	9.1	23.5	17.6	31.4	21.5	56.051	16.5	29.8	20.3	55.3691	17.9	32.1	21.4	55.7632	18.2	31.6	21.8	57.5949		34.7							22	44.4	24.6	49.5495	18.6	42.2	24.6	44.0758
Richtersius coronifer	NO.385	8	934	83	60	8.3	2.9	35.2	13.1	9.7	24.7	15	25.9		57.9151	15.1	28	21.5	53.9286		30.3							14.2	28.2	20.5	50.3546	17.7	31.1	18.8	56.9132					16.9	35.3	21.5	47.8754
Richtersius coronifer	NO.385	9	929	91	67.1	8.3	3.5	43.1	13.6	8.3	28.5	12.3	25.6	17	48.0469	15.4	27.2	18.2	56.6176	14.7	29	17.7	50.6897	15.2	30.1	17.9	50.4983	14.3	28.3	17.7	50.53	12.8	27.9	15.7	45.8781	17.3	34.2	19.9	50.5848	16.9	34.9	20.6	48.4241
Richtersius coronifer	NO.385	10	953	89.4	64.6	9.3	1.6	43.1	13.2	10.8	25.2	15.8	28.5	20	55.4386	14.6	27.9	18.1	52.3297	16.4	31.3	19.7	52.3962	14.9	33.3	16.8	44.7447	18.4	33.6	22.2	54.7619	15.4	32	17.6	48.125	15.2	32.7	23.9	46.4832	18.9	39.3	23.2	48.0916
Richtersius coronifer	NO.385	11	929	91.2	65.8	7.7	1.8	39.5	14.4	10.1	26.3									15.4	27.7	19.1	55.5957	14.8	27	17.9	54.8148	15.9	27.6	20.5	57.6087	16.1	28.1	18	57.2954	19.8	36.3	24.7	54.5455	16.9	36.2	26.5	46.6851
Richtersius coronifer	NO.385	12	918	96.6	71.9	8	2.2	45.1	15.4	9.6	26.5	16.9	29	19.1	58.2759	15.6	29.6	16.7	52.7027	17.1	33.7	20.9	50.7418	15.4	35.2	20.7	43.75	17	32.5	20	52.3077					16.5	38.3	21.1	43.0809	23.5	41.4	27.3	56.7633
Richtersius coronifer	NO.385	13	841	89.7	66.7	8	1.5	41.5	13.2	8.7	23	14.9	29.1	19.7	51.2027	13.7	26.4	15.6	51.8939	16.7	29.9	18.4	55.8528	14.7	28.7	17.4	51.2195	15.5	27.2	20.7	56.9853	16.2	33	18.9	49.0909	16.4	36.6	18.9	44.8087	16.7	33.2	17.1	50.3012
Richtersius coronifer	NO.385	14	826	94.8	70	10	1.9	39.1	14.4	10.3	26	15.4	26	18.8	59.2308	14.9	28.7	18.3	51.9164	15.9	27.8	19.7	57.1942	16.5	30.8	18.8	53.5714									18.9	37.1	21.8	50.9434	18.6	36.7	21.2	50.6812
Richtersius coronifer	NO.385	15	717	83.2	60.5	7.4	2	39.9	9.1	7.2	18.4	13.6	25.4	14.1	53.5433	14	27.4	17.4	51.0949	13.7	29.1	16.2	47.079	14.1	30.2	17.1	46.6887	15.4	29.1	17.3	52.921	13.9	28	15.1	49.6429	16.9	36.3	17.9	46.5565	18.3	34.1	21.9	53.6657
Richtersius coronifer	NO.385	16	651	86.6	63.8	7.7	1.9	41.6	11.8	8.2	20.8									16.2	29.8	19.5	54.3624	15	32	17.2	46.875	17.2	30	19.9	57.3333	13.7	30.2	13.6	45.3642	16.6	39.2	20.6	42.3469	19	35.9	21.3	52.9248
Richtersius coronifer	NO.385	17	499	71.2	53.8	6.7	1.4	32.3	7.5	7	14.8					10.7	23.6	14.4	45.339	10.2	24	13.4	42.5	10.6	24.6	13.4	43.0894	10.4	24.2	13.5	42.9752	10.1	25.1	14.5	40.239	14.1	30.8	15.3	45.7792	13.9	30.5	16	45.5738
Richtersius coronifer	NO.385	18	572	69.7	52.3	7.2	1.6	32	9	7.2	17.6	12.6	23	12.1	54.7826	10.7	24.8	12.5	43.1452	10.1	24.7	14.2	40.8907	10.4	24.4	13	42.623	9.7	24.7	12.2	39.2713	9.8	24.1	12.3	40.6639	12.6	29.1	13.6	43.299	15.1	31.3	14.1	48.2428
Richtersius coronifer	NO.385	19	532	70.7	53.4	5.6	1.7	34.9	8	7.1	16.5	9.2	21.6	12.4	42.5926	8.6	21.4	10.9	40.1869	9.6	23.6		40.678	9	23.7	13.2	37.9747									13.2	29.4	25.4	44.898	11.4	27.3	12.8	41.7582
Richtersius coronifer	NO.385	20	571	71.2	53.4	7.5	1.7	36	8.8	7.9	17.6	9.4	22.4	13.2	41.9643	9.7		12.2		10.6	24.3	14.8	43.6214	12.6	24.3	15.5	51.8519	11.4	24.7	13.5	46.1538	11.3	24.1	13.5	46.888	15.5	34.1	17.3	45.4545	13.8	31.2	15.7	44.2308
Richtersius coronifer	NO.385	21	602	72.8	53.2	5.9	1.8	36	8	7.9	16.6	11.3	20.9	14.3	54.067	9.1	20.8	10.7	43.75										24.7			10.5	22.6	13.7	46.4602	15	32.5	16.5	46.1538	12.9	31.4	15.3	41.0828
Richtersius coronifer	NO.385	22	889	100.5	74.4	7.6	2.1	41.6	14.6	9.8	25.3						25.3	14.8		14.3	28	19.2	51.0714		27.7	16.6
Richtersius coronifer	NO.385	23	902	90.6	67.4	9.3	1.8	45.9	14.4	9.5	23.4					15.2	29.9	19.7	50.8361		30.9	18.7		18.2	31.6	20.6	57.5949	16.4	31.8	22.9	51.5723	14.9	30.9	18.6	48.2201	20.3		23			37.1	22.8
Richtersius coronifer	NO.385	24	807	92.7	69.3	8.6	2.3	47.6	13.8	9.2	23.3	15.9	27.2	20.1	58.4559	14.2	27.8	18.3	51.0791	17.4	31.2	22.9	55.7692	15.2	29.6	18.4	51.3514		30.9	21.3		16.8	33.2	19.6	50.6024	21.4	42	28	50.9524	20.9	39	24.1	53.5897
Richtersius coronifer	NO.385	25	807	98.6	72.9	7.8	1.7	47.5	13.4	9.3	22.9	15	28	19.7	53.5714					17.3	29.7	21.4	58.2492	16.4	30	21.6	54.6667									21.2	41.7	25.3	50.8393	21.4	38	24	56.3158
Richtersius coronifer	NO.385	26	777	92.2	69.6	9.7	1.7	40.1	13.8	11.4	24.4	15	28.3	18.4	53.0035	15.6	27.8	18.8	56.1151	17	29.2	20	58.2192	17.5	30.5	19	57.377	15.2	28.3	18.6	53.7102	15.2	28.2	29.2	53.9007		29.9				27.2
Richtersius coronifer	NO.385	27	689	82.2	60.4	7.2	1.9	38.8	12.1	7.8	21.6	15.7	30.2	25.4	51.9868	14.2	27.9	15.1	50.8961	12.7	27.3	16.1	46.5201	15	29.5	15.9	50.8475									18.3	35.7	16.8	51.2605	18.5	35.6	17	51.9663
Richtersius coronifer	NO.385	28	714	80.4	59.7	7.2	1.9	36.2	8.2	7	17.4	12.2	23.6	15.9	51.6949	12	23.6	13.6	50.8475	12.6	25.4	15.1	49.6063	13.6	28.3	15.9	48.0565	14	26.9	17	52.0446	14.6	28.3	15.8	51.5901	19.3	37.8	20.6	51.0582	16.7	33.9	18	49.2625
Richtersius coronifer	NO.385	29	666	84.1	61.4	6.8	1.8	41.7	10.5	8.1	23.5	13.1	25.3	16.5	51.7787	13.1	26	16.4	50.3846	14	28.3	17.9	49.47	14.4	28.9	16.6	49.827	14.6	27.8	18.6	52.518	14.2	28.6	16.4	49.6503
Richtersius coronifer	NO.385	30	544	72.7	54.9	7	1.2	32	9.2	8.2	18.8	11.7	23.4	13.3	50	12.9	25.2	11.2	51.1905	12	23.2	11.3	51.7241	11.5	24.3	12.8	47.3251	12.4	24.3	13.1	51.0288	11.5	22.6	11.5	50.885	16.9	32.9	15	51.3678	16.8	32.5	15.6	51.6923

## Sheet: animals_stats (pt)
Species	Population	Individual	Body length	Stylet support insertion point	Buccal tube external width	Buccal tube internal width	Ventral lamina length	Macroplacoid 1	Macroplacoid 2	Macroplacoid row	Claw 1 external base	Claw 1 external primary branch	Claw 1 external secondary branch	Claw 1 internal base	Claw 1 internal primary branch	Claw 1 internal secondary branch	Claw 2 external base	Claw 2 external primary branch	Claw 2 external secondary branch	Claw 2 internal base	Claw 2 internal primary branch	Claw 2 internal secondary branch	Claw 3 external base	Claw 3 external primary branch	Claw 3 external secondary branch	Claw 3 internal base	Claw 3 internal primary branch	Claw 3 internal secondary branch	Claw 4 anterior base	Claw 4 anterior primary branch	Claw 4 anterior secondary branch	Claw 4 posterior base	Claw 4 posterior primary branch	Claw 4 posterior secondary branch
Richtersius coronifer	NO.385	1 (HOL)	1056.93	73.899	10.2041	2.04082	46.5091	12.2449	10.8485	24.5972	18.0451	30.8593	23.7379	13.7487	28.0344		16.5414	32.7605	24.5972	16.7562	32.3308	21.16	18.797	33.7272	23.7379	16.971	33.5124	21.0526	20.3008	42.7497	25.0269	23.7379	42.9646	27.8195
Richtersius coronifer	NO.385	2	754.875	75.6267	8.91365	2.22841	44.7075	15.4596	11.2813	27.8552	15.3203	33.0084	20.0557	16.4345	33.2869	17.9666		34.4011	21.0306		35.7939	17.8273	15.7382	34.4011	20.3343	15.5989	35.5153	18.8022	21.727	52.6462	24.234	20.7521	46.5181	23.3983
Richtersius coronifer	NO.385	3	807.299	74.7445	9.92701	2.48175	48.7591	14.5985	9.05109	26.1314	15.6204	35.3285	20.7299	17.0803	36.4964	20.438	17.3723	38.6861	20.8759	15.1825	36.3504	19.2701	14.8905	35.0365	17.5182	16.2044	37.2263	18.1022	21.8978	48.1752	26.1314	21.0219	48.1752	24.5255
Richtersius coronifer	NO.385	4	1038.42	74.6208	10.2123	1.92113	43.6805	15.6724	11.6279	26.4914	16.8857	29.0192	20.5258	16.7846	29.0192	19.9191	19.2113	33.9737	17.6946	17.2902	31.6481	19.6158	18.5035	41.1527	22.8514	20.8291	42.8716	24.1658	15.0657	33.1648	20.2224	16.9869	34.1759	19.3124
Richtersius coronifer	NO.385	5	1023.04	74.0314	10.9948	2.40838	47.4346	13.822	11.4136	27.0157	17.801	32.5654	22.4084	16.8586	32.2513	20		33.089	23.6649	16.9634	34.6597	19.4764	18.2199	40.1047	24.1885	17.4869	32.5654	19.7906	20.733	39.7906	23.7696	18.1152	41.3613	20.5236
Richtersius coronifer	NO.385	6	1009.23	72.203	10.3806	2.42215	43.0219	15.917	12.5721	29.1811	17.7624	30.1038	23.2987		31.1419		17.9931	32.1799	23.5294	19.0311	33.4487	22.6067	17.9931	33.4487	23.4141					44.5213		19.2618	42.7912	24.1061
Richtersius coronifer	NO.385	7	1052.57	72.3131	9.11215	2.45327	40.0701	15.5374	10.6308	27.4533	20.5607	36.6822	25.1168	19.2757	34.8131	23.715	20.9112	37.5	25	21.2617	36.9159	25.4673		40.5374					25.7009	51.8692	28.7383	21.729	49.2991	28.7383
Richtersius coronifer	NO.385	8	1125.3	72.2892	10	3.49398	42.4096	15.7831	11.6867	29.759	18.0723	31.2048		18.1928	33.7349	25.9036		36.506					17.1084	33.9759	24.6988	21.3253	37.4699	22.6506				20.3614	42.5301	25.9036
Richtersius coronifer	NO.385	9	1020.88	73.7363	9.12088	3.84615	47.3626	14.9451	9.12088	31.3187	13.5165	28.1319	18.6813	16.9231	29.8901	20	16.1538	31.8681	19.4505	16.7033	33.0769	19.6703	15.7143	31.0989	19.4505	14.0659	30.6593	17.2527	19.011	37.5824	21.8681	18.5714	38.3516	22.6374
Richtersius coronifer	NO.385	10	1066	72.2595	10.4027	1.78971	48.2103	14.7651	12.0805	28.1879	17.6734	31.8792	22.3714	16.3311	31.2081	20.2461	18.3445	35.0112	22.0358	16.6667	37.2483	18.7919	20.5817	37.5839	24.8322	17.226	35.7942	19.6868	17.0022	36.5772	26.7338	21.1409	43.9597	25.9508
Richtersius coronifer	NO.385	11	1018.64	72.1491	8.44298	1.97368	43.3114	15.7895	11.0746	28.8377							16.886	30.3728	20.943	16.2281	29.6053	19.6272	17.4342	30.2632	22.4781	17.6535	30.8114	19.7368	21.7105	39.8026	27.0833	18.5307	39.693	29.057
Richtersius coronifer	NO.385	12	950.311	74.4306	8.28157	2.27743	46.6874	15.942	9.93789	27.4327	17.4948	30.0207	19.7723	16.1491	30.6418	17.2878	17.7019	34.8861	21.6356	15.942	36.4389	21.4286	17.5983	33.6439	20.7039				17.0807	39.648	21.8427	24.3271	42.8571	28.2609
Richtersius coronifer	NO.385	13	937.57	74.359	8.91862	1.67224	46.2653	14.7157	9.699	25.641	16.6109	32.4415	21.9621	15.2731	29.4314	17.3913	18.6176	33.3333	20.5128	16.388	31.9955	19.398	17.2798	30.3233	23.0769	18.0602	36.7893	21.0702	18.2832	40.8027	21.0702	18.6176	37.0123	19.0635
Richtersius coronifer	NO.385	14	871.308	73.8397	10.5485	2.00422	41.2447	15.1899	10.865	27.4262	16.2447	27.4262	19.8312	15.7173	30.2743	19.3038	16.7722	29.3249	20.7806	17.4051	32.4895	19.8312							19.9367	39.135	22.9958	19.6203	38.7131	22.3629
Richtersius coronifer	NO.385	15	861.779	72.7163	8.89423	2.40385	47.9567	10.9375	8.65385	22.1154	16.3462	30.5288	16.9471	16.8269	32.9327	20.9135	16.4663	34.976	19.4712	16.9471	36.2981	20.5529	18.5096	34.976	20.7933	16.7067	33.6538	18.149	20.3125	43.6298	21.5144	21.9952	40.9856	26.3221
Richtersius coronifer	NO.385	16	751.732	73.6721	8.89145	2.194	48.037	13.6259	9.46882	24.0185							18.7067	34.4111	22.5173	17.321	36.9515	19.8614	19.8614	34.642	22.9792	15.8199	34.873	15.7044	19.1686	45.2656	23.7875	21.94	41.455	24.5958
Richtersius coronifer	NO.385	17	700.843	75.5618	9.41011	1.96629	45.3652	10.5337	9.83146	20.7865				15.0281	33.1461	20.2247	14.3258	33.7079	18.8202	14.8876	34.5506	18.8202	14.6067	33.9888	18.9607	14.1854	35.2528	20.3652	19.8034	43.2584	21.4888	19.5225	42.8371	22.4719
Richtersius coronifer	NO.385	18	820.66	75.0359	10.33	2.29555	45.911	12.9125	10.33	25.2511	18.0775	32.9986	17.3601	15.3515	35.5811	17.934	14.4907	35.4376	20.373	14.9211	35.0072	18.6514	13.9168	35.4376	17.5036	14.0603	34.5768	17.6471	18.0775	41.7504	19.5122	21.6643	44.9067	20.2296
Richtersius coronifer	NO.385	19	752.475	75.5304	7.92079	2.40453	49.3635	11.3154	10.0424	23.338	13.0127	30.5516	17.5389	12.1641	30.2687	15.4173	13.5785	33.3805		12.7298	33.5219	18.6704							18.6704	41.5842	35.9264	16.1245	38.6139	18.1047
Richtersius coronifer	NO.385	20	801.966	75	10.5337	2.38764	50.5618	12.3596	11.0955	24.7191	13.2022	31.4607	18.5393	13.6236		17.1348	14.8876	34.1292	20.7865	17.6966	34.1292	21.7697	16.0112	34.691	18.9607	15.8708	33.8483	18.9607	21.7697	47.8933	24.2978	19.382	43.8202	22.0506
Richtersius coronifer	NO.385	21	826.923	73.0769	8.1044	2.47253	49.4505	10.989	10.8516	22.8022	15.522	28.7088	19.6429	12.5	28.5714	14.6978								33.9286		14.4231	31.044	18.8187	20.6044	44.6429	22.6648	17.7198	43.1319	21.0165
Richtersius coronifer	NO.385	22	884.577	74.0299	7.56219	2.08955	41.393	14.5274	9.75124	25.1741					25.1741	14.7264	14.2289	27.8607	19.1045		27.5622	16.5174
Richtersius coronifer	NO.385	23	995.585	74.3929	10.2649	1.98675	50.6623	15.894	10.4857	25.8278				16.777	33.0022	21.7439		34.106	20.6402	20.0883	34.8786	22.7373	18.1015	35.0993	25.2759	16.4459	34.106	20.5298	22.4062		25.3863		40.9492	25.1656
Richtersius coronifer	NO.385	24	870.55	74.7573	9.27724	2.48112	51.3484	14.8867	9.92449	25.1348	17.1521	29.342	21.6828	15.3182	29.9892	19.7411	18.7702	33.657	24.7033	16.397	31.931	19.849		33.3333	22.9773	18.123	35.8145	21.1435	23.0852	45.3074	30.205	22.5458	42.0712	25.9978
Richtersius coronifer	NO.385	25	818.458	73.9351	7.91075	1.72414	48.1744	13.5903	9.43205	23.2252	15.213	28.3976	19.9797				17.5456	30.1217	21.7039	16.6329	30.426	21.9067							21.501	42.2921	25.6592	21.7039	38.5396	24.3408
Richtersius coronifer	NO.385	26	842.733	75.4881	10.5206	1.84382	43.4924	14.9675	12.3644	26.4642	16.269	30.6941	19.9566	16.9197	30.1518	20.3905	18.4382	31.6703	21.692	18.9805	33.0803	20.6074	16.4859	30.6941	20.1735	16.4859	30.5857	31.6703		32.4295			29.5011
Richtersius coronifer	NO.385	27	838.2	73.4793	8.75912	2.31144	47.2019	14.7202	9.48905	26.2774	19.0998	36.7397	30.9002	17.2749	33.9416	18.3698	15.4501	33.2117	19.5864	18.2482	35.8881	19.3431							22.2628	43.4307	20.438	22.5061	43.309	20.6813
Richtersius coronifer	NO.385	28	888.06	74.2537	8.95522	2.36318	45.0249	10.199	8.70647	21.6418	15.1741	29.3532	19.7761	14.9254	29.3532	16.9154	15.6716	31.592	18.7811	16.9154	35.199	19.7761	17.4129	33.4577	21.1443	18.1592	35.199	19.6517	24.005	47.0149	25.6219	20.7711	42.1642	22.3881
Richtersius coronifer	NO.385	29	791.914	73.0083	8.08561	2.14031	49.5838	12.4851	9.63139	27.9429	15.5767	30.0832	19.6195	15.5767	30.9156	19.5006	16.6468	33.6504	21.2842	17.1225	34.3639	19.7384	17.3603	33.0559	22.1165	16.8847	34.0071	19.5006
Richtersius coronifer	NO.385	30	748.281	75.5158	9.62861	1.65062	44.0165	12.6547	11.2792	25.8597	16.0935	32.1871	18.2944	17.7442	34.663	15.4058	16.5062	31.912	15.5433	15.8184	33.425	17.6066	17.0564	33.425	18.0193	15.8184	31.0867	15.8184	23.2462	45.2545	20.6327	23.1087	44.7043	21.458

## Sheet: eggs_stats (µm)
Species	Population	egg	Egg bare diameter	Egg full diameter	Process height	Process base width	Process base/height ratio	Inter-process distance	Number of processes on the egg circumference
Richtersius coronifer	NO.385	1	223	259.7	21.9667	4.63333	0.211394	11.0667	62
Richtersius coronifer	NO.385	2	205.9	240.5	22.8333	5.86667	0.257229	6.2	67
Richtersius coronifer	NO.385	3	215.5	249.1	22.8	5.66667	0.249814	7.9	70
Richtersius coronifer	NO.385	4	206.5	234.4	21.9667	4.56667	0.207859	7.63333	73
Richtersius coronifer	NO.385	5	208.3	249.6	22.4667	4.23333	0.189501	8.06667	75
Richtersius coronifer	NO.385	6	182	218	20.8333	4.2	0.203078	6.36667	61
Richtersius coronifer	NO.385	7	233.4	263.7	24.8	4.6	0.18704	6.1	65
Richtersius coronifer	NO.385	8	221.7	252.3	20.5	5.26667	0.257625	7.3	73
Richtersius coronifer	NO.385	9	197.7	227.7	17.5	4.93333	0.277637	8.86667	66
Richtersius coronifer	NO.385	10	176	206.3	17.1	4.93333	0.288569	9.6	60
Richtersius coronifer	NO.385	11	176.1	209.2	20.6	4.56667	0.221251	8.16667	65
Richtersius coronifer	NO.385	12	180.6	214.2	23.8333	4.4	0.184714	9.23333	67
Richtersius coronifer	NO.385	13	185.9	215.5	18.9667	4.46667	0.236272	9.23333	68
Richtersius coronifer	NO.385	14	208.4	245.5	25.3333	4.83333	0.190608	8.73333	63
Richtersius coronifer	NO.385	15	204.6	246.9	26.7	5.33333	0.199276	9.5	77
Richtersius coronifer	NO.385	16	182.6	220.8	25	5.8	0.232379	7.26667	67
Richtersius coronifer	NO.385	17	186.6	211.7	13.2667	3.7	0.278844	8.7	66
Richtersius coronifer	NO.385	18	222.7	246.5	23.5	5.16667	0.222114	9.5	62
Richtersius coronifer	NO.385	19	194.5	227.1	23.4667	5.76667	0.24471	7.03333	64
Richtersius coronifer	NO.385	20	227.5	246.5	19.7333	4.73333	0.24399	6.36667	62
Richtersius coronifer	NO.385	21	199.4	227.8	25.1667	4.66667	0.185468	6.96667	65
Richtersius coronifer	NO.385	22	203.5	218.5	22.0667	4.1	0.185317	10.2333	64
Richtersius coronifer	NO.385	23	173.2	201.5	17.4667	4.8	0.275967	7.66667	60
Richtersius coronifer	NO.385	24	198.7	237.2	20.9667	3.36667	0.16244	10.6	71
Richtersius coronifer	NO.385	25	188.8	223.9	21.2	3.86667	0.18379	6.76667	73
Richtersius coronifer	NO.385	26	196.9	225.8	22.5333	3.73333	0.165782	10.5667	66
Richtersius coronifer	NO.385	27	213.5	244.4	21.9	3.66667	0.167493	11.1333	68
Richtersius coronifer	NO.385	28	207.5	240.2	23.7	4.36667	0.186062	8.13333	71
Richtersius coronifer	NO.385	29	197.5	239.6	21.8333	4.4	0.205143	8.46667	70
Richtersius coronifer	NO.385	30	199.5	247.3	20.7667	4	0.193637	7.26667	71
