# Supplementary material for: A new redescription of Richtersius coronifer, supported by transcriptome, provides resources for describing concealed species diversity within the monotypic genus Richtersius (Eutardigrada)
Source: Zoological Lett. 2020 Feb 5;6:2. doi: 10.1186/s40851-020-0154-y (PMC7003491; doi:10.1186/s40851-020-0154-y)
Supplement: Supplementary file 3 — Additional file 3. Uncorrected pairwise distances between Richtersius spp. [file 40851_2020_154_MOESM3_ESM.xlsx]

## Sheet: 18S rRNA
		1	2	3	4	5	6	7	8	9	10	11	12	13	14	15	16	17
1	Ric.cor_NO.385
2	Ric.af.cor_IT.120	0.0117955
3	Ric.af.cor_PL.246	0.0104849	0.00131062
4	Ric.af.cor_GR.008	0.00917431	0.00524246	0.00393185
5	Ric.af.cor_IT.317	0.00917431	0.00262123	0.00131062	0.00262123
6	Ric.cor_AY582123	0.0131062	0.00393185	0.00262123	0.00655308	0.00393185
7	Ric.cor_EU266930	0.0144168	0.0183486	0.017038	0.0157274	0.0157274	0.0196592
8	Ric.cor_EU266931	0.0157274	0.0196592	0.0183486	0.017038	0.017038	0.0209699	0.00131062
9	Ric.cor_HQ604987	0.00917431	0.00262123	0.00131062	0.00262123	0	0.00393185	0.0157274	0.017038
10	Ric.cor_HQ604988	0.00917431	0.00262123	0.00131062	0.00262123	0	0.00393185	0.0157274	0.017038	0
11	Ric.cf.cor_KT778706	0.0117955	0.00262123	0.00131062	0.00524246	0.00262123	0.00393185	0.0183486	0.0196592	0.00262123	0.00262123
12	Ric.cf.cor_KT778707	0.0117955	0.00262123	0.00131062	0.00524246	0.00262123	0.00393185	0.0183486	0.0196592	0.00262123	0.00262123	0
13	Ric.cf.cor_KT778708	0	0.0117955	0.0104849	0.00917431	0.00917431	0.0131062	0.0144168	0.0157274	0.00917431	0.00917431	0.0117955	0.0117955
14	Ric.cf.cor_KT778709	0	0.0117955	0.0104849	0.00917431	0.00917431	0.0131062	0.0144168	0.0157274	0.00917431	0.00917431	0.0117955	0.0117955	0
15	Ric.cf.cor_KT778710	0	0.0117955	0.0104849	0.00917431	0.00917431	0.0131062	0.0144168	0.0157274	0.00917431	0.00917431	0.0117955	0.0117955	0	0
16	Ric.cf.cor_KT778711	0.00917431	0.00262123	0.00131062	0.00262123	0	0.00393185	0.0157274	0.017038	0	0	0.00262123	0.00262123	0.00917431	0.00917431	0.00917431
17	Ric.cf.cor_KT778712	0.00131062	0.0131062	0.0117955	0.0104849	0.0104849	0.0144168	0.0157274	0.017038	0.0104849	0.0104849	0.0131062	0.0131062	0.00131062	0.00131062	0.00131062	0.0104849
18	Ric.cf.cor_KT778713	0.00131062	0.0131062	0.0117955	0.0104849	0.0104849	0.0144168	0.0157274	0.017038	0.0104849	0.0104849	0.0131062	0.0131062	0.00131062	0.00131062	0.00131062	0.0104849	0

## Sheet: 28S rRNA
		1	2	3	4
1	Ric.cor_NO.385
2	Ric.af.cor_IT.120	0.0352941
3	Ric.af.cor_PL.246	0.0352941	0
4	Ric.af.cor_GR.008	0.0418301	0.0117647	0.0117647
5	Ric.af.cor_IT.317	0.0366013	0.00653595	0.00653595	0.00522876

## Sheet: ITS-2
		1	2	3	4	5	6
1	Ric.cor_NO.385
2	Ric.af.cor_IT.120	0.208955
3	Ric.af.cor_PL.246	0.20398	0.00497512
4	Ric.af.cor_GR.008_H1	0.211443	0.0920398	0.0870647
5	Ric.af.cor_GR.008_H2	0.208955	0.0945274	0.0895522	0.00248756
6	Ric.af.cor_IT.317_H1	0.218905	0.0995025	0.0945274	0.0696517	0.0721393
7	Ric.af.cor_IT.317_H2	0.218905	0.0995025	0.0945274	0.0696517	0.0721393	0.00497512

## Sheet: COI
		1	2	3	4	5	6	7	8	9	10	11	12	13	14	15	16	17	18	19	20	21	22	23	24	25	26	27	28	29	30
1	Ric.cor_NO.385
2	Ric.af.cor_IT.120	0.21147
3	Ric.af.cor_PL.246	0.209677	0.0125448
4	Ric.af.cor_GR.008_H1	0.218638	0.207885	0.206093
5	Ric.af.cor_GR.008_H2	0.218638	0.213262	0.21147	0.016129
6	Ric.af.cor_GR.008_H3	0.216846	0.21147	0.209677	0.016129	0.0179211
7	Ric.af.cor_IT.317_H1	0.204301	0.200717	0.207885	0.177419	0.173835	0.175627
8	Ric.af.cor_IT.317_H2	0.202509	0.195341	0.202509	0.172043	0.168459	0.170251	0.0268817
9	Ric.af.cor_IT.317_H3	0.202509	0.198925	0.206093	0.175627	0.172043	0.173835	0.00179211	0.0250896
10	Ric.cf.cor_KT778683	0.100358	0.200717	0.200717	0.207885	0.209677	0.213262	0.197133	0.193548	0.195341
11	Ric.cf.cor_KT778684	0.0967742	0.200717	0.200717	0.206093	0.207885	0.21147	0.195341	0.191756	0.193548	0.0125448
12	Ric.cf.cor_KT778685	0.0949821	0.198925	0.198925	0.204301	0.206093	0.209677	0.189964	0.18638	0.188172	0.0107527	0.0125448
13	Ric.cf.cor_KT778686	0.0967742	0.197133	0.197133	0.206093	0.207885	0.21147	0.189964	0.18638	0.188172	0.00896057	0.0107527	0.00537634
14	Ric.cf.cor_KT778687	0.0985663	0.204301	0.204301	0.206093	0.21147	0.21147	0.200717	0.189964	0.198925	0.0179211	0.0197133	0.0250896	0.0232975
15	Ric.cf.cor_KT778688	0.0949821	0.197133	0.197133	0.206093	0.207885	0.21147	0.191756	0.188172	0.189964	0.00716846	0.00896057	0.00358423	0.00179211	0.0215054
16	Ric.cf.cor_KT778689	0.0949821	0.197133	0.197133	0.206093	0.207885	0.21147	0.191756	0.188172	0.189964	0.00716846	0.00896057	0.00358423	0.00179211	0.0215054	0
17	Ric.cf.cor_KT778690	0.00179211	0.209677	0.207885	0.22043	0.22043	0.218638	0.206093	0.204301	0.204301	0.102151	0.0985663	0.0967742	0.0985663	0.100358	0.0967742	0.0967742
18	Ric.cf.cor_KT778691	0.00537634	0.213262	0.21147	0.222222	0.222222	0.22043	0.207885	0.206093	0.206093	0.105735	0.102151	0.100358	0.102151	0.103943	0.100358	0.100358	0.00358423
19	Ric.cf.cor_KT778692	0.00179211	0.209677	0.207885	0.22043	0.22043	0.218638	0.206093	0.204301	0.204301	0.102151	0.0985663	0.0967742	0.0985663	0.100358	0.0967742	0.0967742	0	0.00358423
20	Ric.cf.cor_KT778693	0.00179211	0.209677	0.207885	0.22043	0.22043	0.218638	0.206093	0.204301	0.204301	0.102151	0.0985663	0.0967742	0.0985663	0.100358	0.0967742	0.0967742	0	0.00358423	0
21	Ric.cf.cor_KT778694	0.00179211	0.209677	0.207885	0.22043	0.22043	0.218638	0.206093	0.204301	0.204301	0.102151	0.0985663	0.0967742	0.0985663	0.100358	0.0967742	0.0967742	0	0.00358423	0	0
22	Ric.cor_EU244606	0.215054	0.0197133	0.0215054	0.21147	0.216846	0.215054	0.200717	0.198925	0.198925	0.209677	0.209677	0.207885	0.206093	0.21147	0.206093	0.206093	0.213262	0.216846	0.213262	0.213262	0.213262
23	Ric.cor_EU244607	0.00358423	0.21147	0.209677	0.222222	0.222222	0.22043	0.207885	0.206093	0.206093	0.103943	0.100358	0.0985663	0.100358	0.102151	0.0985663	0.0985663	0.00179211	0.00537634	0.00179211	0.00179211	0.00179211	0.215054
24	Ric.cf.cor_EU251383	0.216846	0.0268817	0.0286738	0.204301	0.209677	0.204301	0.193548	0.188172	0.191756	0.206093	0.206093	0.200717	0.202509	0.209677	0.202509	0.202509	0.215054	0.218638	0.215054	0.215054	0.215054	0.0232975	0.216846
25	Ric.cf.cor_EU251384	0.216846	0.0286738	0.0304659	0.202509	0.207885	0.206093	0.195341	0.189964	0.193548	0.204301	0.204301	0.198925	0.200717	0.207885	0.200717	0.200717	0.215054	0.218638	0.215054	0.215054	0.215054	0.0250896	0.216846	0.00179211
26	Ric.cf.cor_EU251385	0.215054	0.0197133	0.0215054	0.21147	0.216846	0.215054	0.200717	0.198925	0.198925	0.209677	0.209677	0.207885	0.206093	0.21147	0.206093	0.206093	0.213262	0.216846	0.213262	0.213262	0.213262	0	0.215054	0.0232975	0.0250896
27	Ric.cor_AY598780	0.204301	0.198925	0.207885	0.198925	0.197133	0.195341	0.189964	0.184588	0.188172	0.204301	0.202509	0.197133	0.198925	0.209677	0.197133	0.197133	0.206093	0.209677	0.206093	0.206093	0.206093	0.202509	0.207885	0.197133	0.198925	0.202509
28	Ric.cor_AY598781	0.204301	0.198925	0.207885	0.198925	0.197133	0.195341	0.189964	0.184588	0.188172	0.204301	0.202509	0.197133	0.198925	0.209677	0.197133	0.197133	0.206093	0.209677	0.206093	0.206093	0.206093	0.202509	0.207885	0.197133	0.198925	0.202509	0
29	Ric.sp._JX865316	0.206093	0.215054	0.218638	0.193548	0.191756	0.189964	0.200717	0.193548	0.198925	0.209677	0.206093	0.204301	0.202509	0.209677	0.202509	0.202509	0.207885	0.21147	0.207885	0.207885	0.207885	0.222222	0.209677	0.222222	0.222222	0.222222	0.207885	0.207885
30	Ric.cor_GU237485	0.18638	0.191756	0.191756	0.232975	0.232975	0.238351	0.209677	0.21147	0.207885	0.173835	0.172043	0.170251	0.170251	0.181004	0.170251	0.170251	0.18638	0.189964	0.18638	0.18638	0.18638	0.195341	0.188172	0.193548	0.195341	0.195341	0.218638	0.218638	0.231183
31	Pam.ric_GU339056	0.200717	0.207885	0.207885	0.249104	0.249104	0.252688	0.22043	0.222222	0.218638	0.18638	0.184588	0.182796	0.182796	0.193548	0.182796	0.182796	0.200717	0.204301	0.200717	0.200717	0.200717	0.21147	0.202509	0.207885	0.209677	0.21147	0.236559	0.236559	0.240143	0.0197133

## Sheet: Between species (COI)
		1	2	3	4	5	6	7
1	Richtersius coronifer
2	Ricersius species 3	0.211909
3	Ricersius species 1	0.0983871	0.201741
4	Ricersius species 4	0.205914	0.202672	0.200973
5	Ricersius species 6	0.219624	0.210573	0.208589	0.197133
6	Ricersius species 5	0.20454	0.200011	0.191671	0.187575	0.17279
7	Ricersius species 7	0.207706	0.218964	0.205325	0.207885	0.191756	0.19773
8	Ricersius species 2	0.194086	0.200798	0.178827	0.227599	0.242159	0.215054	0.235663
										Mean genetic distance in COI between molecularly delineated Richtersius species

## Sheet: Within species (COI)
Richtersius coronifer	0.00203106
Ricersius species 3	0.0171391
Ricersius species 1	0.011094
Ricersius species 4	0
Ricersius species 6	0.0140382
Ricersius species 5	0.0179211
Ricersius species 7	0
Ricersius species 2	0.0197133
			Mean genetic distance in COI within molecularly delineated Richtersius species

## Sheet: Between species (ITS-2)
		1	2	3
1	Richtersius coronifer
2	Richtersius species 3	0.206468
3	Richtersius species 6	0.210199	0.090796
4	Richtersius species 5	0.218905	0.0970149	0.0708955
						Mean genetic distance in ITS-2 between molecularly delineated Richtersius species

## Sheet: Within species (ITS-2)
Richtersius coronifer	0
Richtersius species 3	0.00497512
Richtersius species 6	0.00248756
Richtersius species 5	0.00497512
			Mean genetic distance in ITS-2 within molecularly delineated Richtersius species
